1 **The burden of Intestinal helminthic infection and**  
2 **Anaemia among pregnant women in Kabwe, Zambia;**  
3 **a Cross-Sectional study**

4 Mellah Mulenga Kasoma<sup>1,4\*</sup> <sup>¶, #a</sup>, Amon Siame<sup>2#b</sup>, Westone Hamwata<sup>3#c</sup>, Nzooma M.  
5 Shimaponda-Mataa<sup>4 ¶, #b</sup>

6 1. Department of Clinical Medicine, Levy Mwanawasa Medical University,  
7 Kabwe, Zambia

8 2. Department of Pathology and Microbiology, The University of Zambia,  
9 Lusaka, Zambia

10 3. Tropical Diseases Research Centre, Department of Biomedical Sciences,  
11 Vector Biology and Parasitology Unit

12 4. Department of Biomedical Sciences, The University of Zambia, Lusaka,  
13 Zambia

14

15 <sup>#a</sup>Current Address: Department of Clinical Medicine, Levy Mwanawasa Medical  
16 University, Kabwe, Zambia

17 <sup>#b</sup>Current Address: Department of Biomedical Sciences, School of Health Sciences,  
18 The University of Zambia, Lusaka, Zambia

19 <sup>#c</sup> Current Address: Tropical Diseases Research Centre, Department of Biomedical  
20 Sciences, Vector Biology and Parasitology Unit

21 **Corresponding Author:**

22 **\*Mellah Mulenga Kasoma** This preprint and its contents have not been certified by peer review and should not be used to guide clinical practice.

23 mellahkasoma.mk@gmail.com (MK)

24 ¶ Mellah Mulenga Kasoma ,Nzooma M.Shimaponda-Mataa, Westone Hamwata<sup>&</sup>

## 25 **Abstract**

### 26 **Background**

27 Zambia is a developing country where intestinal helminthic infections are a serious  
28 public health concern. In sub-Saharan Africa alone it is estimated that one-third of  
29 pregnant women are infected with soil-transmitted helminthes which can lead to  
30 anaemia in pregnancy. The burden of anaemia, associated with helminths, is an  
31 important contributor to maternal and fetal mortality. This study aimed to determine  
32 the prevalence of intestinal helminthic infection and anaemia among pregnant women  
33 attending Antenatal Care (ANC) in Kabwe, Zambia.

### 34 **Methodology**

35 A health facility-based cross-sectional study was conducted among 442 pregnant  
36 women from November,2021, to February, 2022, in Kabwe, Zambia. Data were  
37 collected using pre-tested questionnaires from three health facilities. Blood and stool  
38 specimens were processed using standard operating procedures. Cleaned and coded  
39 data were entered and analyzed using SPSS version 28. Multivariate binary logistic  
40 regression analysis was used to determine the association of predictors and response  
41 variables at  $P < 0.05$ . Adjusted odds ratio with 95% CI was used to show the strength  
42 of association between predictors and outcome variables.

## 43 **Results**

44 A total of 442 pregnant women were enrolled in this study with a median age of  
45 23 years (range 15–41 years). The total prevalence of intestinal helminths was 24.7%  
46 (75/442) with the predominance of Hookworm (13.3%) followed by *Ascaris*  
47 *lumbricoides* (2.3%). Eating raw vegetables (AOR= 19.67, 95% CI: 1.20 to 321.69),  
48 drinking water from the well (AOR=2.45, 95% CI: 1.17 to 5.17) and Walking barefoot  
49 (AOR=0.25, 95% CI: 0.10 to 0.60) were significant predictors of intestinal helminthic  
50 infection. The overall prevalence of anaemia was 64.9% (281/442).

## 51 **Conclusion**

52 The prevalence of intestinal helminths and anaemia was significantly high in this  
53 study. Eating raw vegetables, walking barefoot and drinking water from the well were  
54 identified as significant contributors to intestinal helminthic infection and anaemia  
55 among pregnant women. Therefore, public health measures and intensive antenatal  
56 care services are vital to promoting safe pregnancy.

57 **Keywords: Helminths; Anaemia; pregnant women.**

## 58 **Author Summary**

59 Many pregnant women in underdeveloped nations suffer from intestinal helminthic  
60 infections and anaemia, which raises their risk of dying during pregnancy and giving  
61 birth to underweight babies, who are also more likely to die. Although it has long been  
62 known that human worm infection is one of the main causes of anaemia in  
63 underdeveloped areas, knowledge of the advantages of treating worm infection during  
64 pregnancy has lagged behind that of other primary causes of maternal anaemia. Low  
65 coverage of anthelmintic treatment in maternal health programmes in many countries

66 including ours has been the result. After conducting the study Intestinal worms and  
67 anaemia were diagnosed in 24.7% and 64.9% of pregnant women in Central Zambia  
68 who provided stool and blood samples. In these women, intestinal worm infections  
69 caused a modest decrease in haemoglobin (Hb) levels. We observed that increasing  
70 worm infection intensity is associated with lower haemoglobin levels in pregnant  
71 women. We also estimate that between a quarter and a third of pregnant women in sub-  
72 Saharan Africa are infected with worms and at risk of preventable anaemia.  
73 Nonetheless, every intervention study that was found demonstrated the advantages of  
74 deworming for the health of the mother or child, and we contend that more should be  
75 done to ensure that pregnant women receive anthelmintic therapy.

## 76 **Introduction**

77 Intestinal parasitic infection (IPI) is a serious public health problem throughout the  
78 world, particularly in developing countries with an estimated 3.8 billion people  
79 infected, 720 million cases, and an estimated 135,000 deaths annually. They are among  
80 the Neglected Tropical Diseases (NTDs) of poverty [1]. Soil-transmitted helminths  
81 (STH) also known as intestinal helminths is a term referring to a group of parasitic  
82 diseases caused by nematode worms that are transmitted to humans by faecally  
83 contaminated soil and packages three intestinal parasites *Trichuris trichuira*,  
84 hookworm, and *Ascaris lumbricoides* [2]. Zambia is a developing country where  
85 intestinal helminths are a major public health problem. Previous studies carried out in  
86 Zambia in children revealed a high prevalence of intestinal infection. The burden of  
87 intestinal parasites, particularly the STHs, is often very high in school children and  
88 pregnant women as high-risk populations [4,5]. Anaemia is a medical condition in  
89 which there is less than the normal haemoglobin (Hb) level in the body, which  
90 decreases the oxygen-carrying capacity of red blood cells to tissues. Anaemia is more  
91 prevalent in developing countries arising from poor nutritional status and the high  
92 prevalence of parasitic infection. Women's health is significantly impacted by  
93 anaemia, particularly in developing countries. Anaemia is a major factor in women's  
94 health, especially during pregnancy for when severe, it significantly contributes to  
95 maternal mortality [6]. Anaemia during pregnancy is defined as a haemoglobin  
96 concentration of less than 11 grams per deciliter (g/dL)[7].

97 Although there are several studies conducted in Zambia that have reported the  
98 magnitude of intestinal parasitic infections. These studies focus on children as being  
99 at high risk. There is a paucity of published data on intestinal helminths and anaemia  
100 in the study area particularly in pregnant women as an additional at-risk population.  
101 Land cultivation is the major economic activity in Kabwe district which plays a crucial  
102 role in the prevalence and transmission of STHs particularly in communities with poor  
103 sanitation. Additionally, the humid climate of the district is also suitable for the  
104 development of intestinal helminths. Furthermore, the availability of street-vending  
105 fruits and the habit of wearing open shoes may also increase the prevalence of  
106 intestinal helminths in Kabwe district of Zambia compared to other countries. The  
107 study's results may help concerned stakeholders take action to prevent intestinal  
108 helminths and anaemia in pregnant women. This study, therefore, aimed to determine  
109 the prevalence of intestinal helminths and associated anaemia among pregnant women  
110 in Kabwe district, Zambia. The aim was achieved.

## 111 **Methods**

### 112 **Study Setting and Context**

113 A health facility-based cross-sectional study was conducted from November 2021 to  
114 February 2022 in three randomly selected health facilities in Kabwe district, Zambia:  
115 Makululu Health Centre, Katondo Clinic, and Kasanda Health Centre.

### 116 **Study Population**

117 Our study population were all pregnant women in the reproductive age 15 to 49 years  
118 old who were attending antenatal services at the selected health centres of Katondo,  
119 Kasanda and Makululu health centres in Kabwe District (14.4285° S, 28.4514° E). The

120 World Health Organization (WHO) defines reproductive age as the period between 15  
121 and 49 years. [8]. The study strictly excluded all the pregnant women who were taking  
122 anthelmintic/anti-protozoan drugs within 6 months before the study and those with  
123 confirmed acute and/or chronic diseases that caused anaemia.

## 124 **Sample Size Determination and Sampling Procedure**

125 The sample size was estimated using a formula for survey sample size estimation  
126 taking 95% level of confidence.

127 The sample size was estimated using a formula for survey sample size estimation at 95%  
128 level of confidence.

129

130 Where;  $n = \frac{(Z_{1-\alpha/2})^2 p (1 - p)}{d^2}$

131

132  $n$  = sample size,  $Z_{1-\alpha/2}$  = value of the standard normal distribution (1.96) corresponding  
133 to a significance level of 0.05 for a 2-sided test,  $d$  = margin of error (0.05), the prevalence  
134 ( $p = 0.41$ ) assumption was based on a survey conducted in Ethiopia [9]

135 Sample size ( $n$ ) = 372, adding by 19% refusal rate

136 The final sample size was 442.

137 To attain the desired unbiased sample size, a systematic random sampling method was  
138 used to recruit the study participants. Every 3rd pregnant mother who visited ANC was  
139 consecutively enrolled until the planned sample size was achieved.

## 140 **Data Collection**

141 Before the actual data collection, the questionnaire was pre-tested on 21 pregnant  
142 women (5% of the total sample size) who were attending ANC in an un-selected health

143 facility, Pollen Health Centre. Pregnant women were informed about the objective of  
144 the study before data collection and semi-structured questionnaires were used to obtain  
145 data on socio-demographic, and environmental related factors, obstetric  
146 characteristics, and dietary habits. The questionnaire was developed in English and  
147 participants were interviewed using the local language; Bemba. Medical Laboratory  
148 professionals who can speak the local language were trained in data collection for this  
149 particular study to attain standardization, maximize interviewer reliability and  
150 minimize bias. The data collectors were regularly supervised by the investigators for  
151 proper data collection. All reagents used were checked for their expiry date and  
152 prepared according to the manufacturer's instructions.

## 153 **Specimen Collection and Processing**

### 154 **Blood Collection**

155 Blood was collected using micro cuvettes to measure the haemoglobin levels (Hb).  
156 Haemoglobin levels were measured on-site using HemoCue Hb 301 (HemoCue AB,  
157 Angelholm Sweden). Blood collection was done using a needle finger prick on the middle  
158 finger of the non-dominant hand the fingertips were first cleaned and disinfected with an  
159 antiseptic solution and allowed to dry before being lightly pressed by the phlebotomist using  
160 their thumb from the top of the knuckle towards the fingertips to stimulate blood flow. While  
161 pressing the finger lightly towards the fingertip, a lancet was used to puncture the fingertip.  
162 The first drop of blood was wiped. Then the finger was pressed lightly towards the fingertip  
163 until another drop of blood appeared. A microcuvette was filled in one step (approximately 10  
164 microliter) of blood when the blood drop was large enough. The microcuvette was wiped from  
165 the outside to ensure that no specimen was drawn from the end, it was then placed in the  
166 cuvette holder and the measurement was started by gently sliding the cuvette holder to the



167 measuring position. After about three seconds, the haemoglobin value was displayed and  
168 recorded after which the micro cuvette was removed and discarded. All the readings were  
169 done within 40 seconds of loading. Anemia was defined based on WHO criteria as; anemia:  
170 haemoglobin level <11 g/dL for pregnant women.

### 171 **Stool Collection**

172 Stool specimen was obtained from all patients selected for the study. A direct saline  
173 and iodine wet mount of each sample was used to detect intestinal parasites  
174 microscopically. The wet mounts were examined under a light microscope at 10× and  
175 40×. A portion of each stool specimen was then taken and processed using formolether  
176 concentration technique following standard procedures. Briefly, 1 g of stool was  
177 placed in a clean conical centrifuge tube containing 7 ml 10% formol water using an  
178 applicator stick. The resulting suspension was filtered through a sieve into another  
179 conical tube. After adding 3–4 ml of diethyl ether to the formalin solution, the content  
180 was centrifuged at 3200 rpm for 1 min. The supernatant was discarded; a smear was  
181 prepared from the sediment and observed under a light microscope with a  
182 magnification of 100× and 400× [9]. Stool samples were recorded as positive with the  
183 presence of ova.

### 184 **Quality Control**

185 One senior midwife who was working in the ANC department at each selected health  
186 facilities and two Health workers were recruited as research assistants who were under  
187 the whole supervision of the principal investigator. Two days of training were  
188 conducted for data collectors to aid in the clarity, consistency, and reliability of  
189 measurements. Collected data were checked for consistency and completeness daily  
190 and pre-analytical, analytical and post-analytical laboratory data quality were

191 controlled accordingly. Quality control was performed on the analytical instrument  
192 (HemoCue) according to the established quality control guidelines and to minimize  
193 observer bias three different laboratory technologists independently examined the  
194 stool microscopy slides before result confirmation. All laboratory analyses were  
195 carried out using standard operating procedures.

## 196 **Data Analysis**

197 The data was cleaned, coded and double-entered. Excel was used for data entry. The  
198 data was exported to SPSS version 28 (SPSS INC, Chicago, IL, USA) software for  
199 analysis. Missing data were managed by observing cross-tabulation results and  
200 percentages. Firstly, all numerical variables including maternal age and haemoglobin  
201 concentration were tested for normality using the Shapiro-Wilkt test. Pearson's Chi-  
202 square test of association was performed to compare the haemoglobin levels with  
203 sociodemographic, lifestyle and parasitic infections. Additionally, a non-parametric  
204 test, Mann-Whitney U-Test was used to explore the correlation between the  
205 distribution of haemoglobin levels and the different parasitic infections. Lastly, Binary  
206 logistic regression models were used to determine the association between predictors  
207 and outcome variables. Bivariate analysis was carried out for each independent  
208 variable to identify the presence of association with the response variable at  $P < 0.25$   
209 Multivariate logistic regression was used to control the possible confounding factors  
210 at  $P < 0.05$ . Adjusted odds ratio with 95% confidence (AOR, 95%CI) was used to infer  
211 the results and all data analyses were done according to standard protocols [5]

## 212 **Ethical Considerations and Permissions**

213 This study involved direct contact with humans and also had potential to invade  
214 participant privacy given that stool collection is confidential and uncomfortable. As

215 such, the study was approved by the Research Ethics Committee of The University of  
216 Zambia. Protocol ID 202112030113. Then an official letter of cooperation was written  
217 to the Kabwe District Office from The University of Zambia and permission was  
218 obtained. All participants were old enough to provide informed consent in line with  
219 local laws. A verbal informed consent process was conducted for participants who  
220 could not read and write. Participants' right during the interview for either not to  
221 participate or to withdraw at any stage of the interview was guaranteed. All the  
222 information obtained from the study participants was coded to maintain confidentiality  
223 and positive results were immediately communicated with clinicians for appropriate  
224 intervention.

## 225 **Results**

### 226 **Socio-demographic Characteristics of Study Participants**

227 A total of 442 pregnant women participated in this study. The median age of the women was  
228 23 years ( $\pm 8$ ) years and the majority (57.7%; 255/442) fell within 20-29 years. The majority  
229 of the women (91%; 382/442) had secondary school education level training. The majority of  
230 the women (63%; 279/442) in this study were single (Table 1)

231 **Table 1: Sociodemographic Characteristics of Pregnant Women attending ANC in**  
232 **Kabwe, Zambia from November 2021 to February 2022**

| <b>Variables</b>        | <b>Frequency<br/>(n = 442)</b> | <b>Percentage (%)</b> | <b>Median <math>\pm</math> Interquartile<br/>Range (IQR)</b> |
|-------------------------|--------------------------------|-----------------------|--------------------------------------------------------------|
| <b>Age (years)</b>      |                                |                       | 23 $\pm$ 8 years                                             |
| 15 – 19                 | 97                             | 21.9                  |                                                              |
| 20 – 24                 | 146                            | 33.0                  |                                                              |
| 25 – 29                 | 109                            | 24.7                  |                                                              |
| 30 – 34                 | 60                             | 13.6                  |                                                              |
| 35 and above            | 30                             | 6.8                   |                                                              |
| <b>Marital Status</b>   |                                |                       |                                                              |
| Married                 | 159                            | 36.0                  |                                                              |
| Single                  | 275                            | 62.2                  |                                                              |
| Widowed                 | 8                              | 1.8                   |                                                              |
| <b>Education Levels</b> |                                |                       |                                                              |
| Primary                 | 39                             | 8.8                   |                                                              |
| Secondary               | 206                            | 46.6                  |                                                              |

|          |     |      |
|----------|-----|------|
| Tertiary | 196 | 44.3 |
| None     | 1   | 0.2  |

**Parity**

|             |     |      |
|-------------|-----|------|
| Nulliparous | 181 | 41.0 |
| Primiparous | 120 | 27.1 |
| Multiparity | 141 | 31.9 |

233

234 **Lifestyle and Behavioural Characteristics of Study Participants**

235 Almost half of the women, 36.7% (162/442) walked barefoot when at home. The majority of  
 236 the women, 84.8% (375/442) ate salads, a significant proportion of women, 93.9 % (415/442),  
 237 washed their fruits before eating. Regarding the source of drinking water, the majority of the  
 238 women, 79.2 % (35/442), rely on tap water, while 20.8% use well water. The study also found  
 239 that a significant proportion of women, 64% (283/442) and 25.8 % (114/442) engage in  
 240 gardening and farming activities, respectively. (Table 2)

241 *Table 2: Lifestyle and Behavioural Characteristics of pregnant women attending ANC in*  
 242 *Kabwe, Zambia from November 2021 to February 2022*

| Variables                          | Frequency (n = 442) | Percentage (%) |
|------------------------------------|---------------------|----------------|
| <b>Eat Salads (raw vegetables)</b> |                     |                |
| No                                 | 64                  | 14.5           |
| Yes                                | 375                 | 84.8           |
| Sometimes                          | 3                   | 0.7            |
| <b>Wash fruits before eating.</b>  |                     |                |
| No                                 | 1                   | 0.2            |

|                                   |     |      |
|-----------------------------------|-----|------|
| Yes                               | 415 | 93.9 |
| Sometimes                         | 26  | 5.9  |
| <b>Walks Barefooted</b>           |     |      |
| No                                | 162 | 36.7 |
| Yes                               | 162 | 36.7 |
| Sometimes                         | 118 | 26.6 |
| <b>Source of Drinking Water</b>   |     |      |
| Tap water                         | 350 | 79.2 |
| Well water                        | 92  | 20.8 |
| <b>Does Gardening or Farming?</b> |     |      |
| No                                | 45  | 10.2 |
| Gardening only                    | 283 | 64.0 |
| Farming only                      | 114 | 25.8 |

---

243

## 244 **Deworming status of study participants**

245 More than half 87.3% (386/442) of the respondents had never received deworming tablets  
246 during the antenatal visits. The study found that a significant proportion of participants had not  
247 been dewormed during the pregnancy or 6 months before the study. (Table 3)

248 *Table 3: deworming status of pregnant women attending ANC in Kabwe, Zambia from*  
249 *November 2021 to February 2022*

| Variables                                | Frequency (n = 442) | Percentage (%) |
|------------------------------------------|---------------------|----------------|
| <b>Deworming status during pregnancy</b> |                     |                |
| Never dewormed                           | 386                 | 87.3           |
| Yes, but more than 6 months ago          | 56                  | 12.7           |

250

## 251 **Prevalence of Intestinal Helminth Infection in study participants**

252 The total prevalence of intestinal helminths in this study was 17% (72/442). The results in Fig  
253 1 show that the majority of the 442 study participants (83%) did not have any intestinal  
254 helminths. On the other hand, a significant proportion of the participants were infected with  
255 one or more species of intestinal helminths. The predominant intestinal helminth was  
256 hookworm which accounted for 13.3% (59/442) followed by *Ascaris lumbricoides* which was  
257 found in 2.3% of the participants. The combination of hookworms and *A. lumbricoides* was  
258 found in 0.7% of the participants, while the combination of hookworms and *S. stercoralis* was  
259 found in 0.5% of the participants. The least common infections were *Trichuris trichura* and  
260 hookworms, *S. stercoralis*, and *A. lumbricoides*, which were found in 0.2%, 0.5%, and 0.7%  
261 respectively.

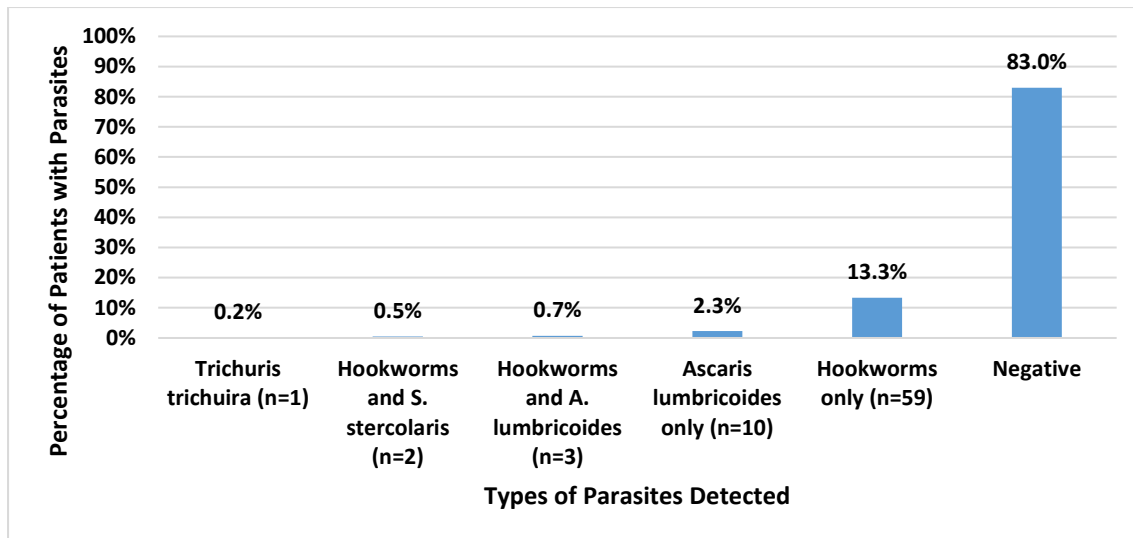

262

263 **Figure 1: Bar Chart Showing the Distribution of Parasites in pregnant women attending**

264 **ANC in Kabwe, Zambia from November 2021 to February 2022**

265

## 266 **Haemoglobin levels and Anaemia status in the study participants**

267 The overall prevalence of anaemia in this study was 35.1% (155/442) with the median

268 haemoglobin level of the pregnant women being 11.7 g/dL $\pm$  2.1 g/dL (Table 5)

269 **Table 4: Haemoglobin Levels of pregnant women attending ANC in Kabwe, Zambia from**

270 **November 2021 to February 2022**

| Variables                | Frequency<br>(n = 442) | Percentage<br>(%) | Median $\pm$ Interquartile Range<br>(IQR) |
|--------------------------|------------------------|-------------------|-------------------------------------------|
| <b>Haemoglobin Level</b> |                        |                   |                                           |
| <b>(g/dL)</b>            |                        |                   |                                           |
| $\geq$ 11g/dl (Normal)   | 287                    | 64.9              | 11.7 $\pm$ 2.1 g/Dl                       |
| <11g/dl (Anaemic)        | 155                    | 35.1              |                                           |



271 **Univariate and Multivariate Logistic Regression Results for**  
272 **Factors Associated with Parasitic Infections in Pregnant Women**  
273 **attending ANC in Kabwe, Zambia from November 2021 to**  
274 **February 2022**

275 The age of the women was not significantly associated with the risk of parasitic infections, as  
276 indicated by the p-value of 0.999 and the odds ratio (OR) of 1.0 (95% CI: 0.96 to 1.04) in both  
277 the univariate and multivariate analyses. Marital status was also non-significantly associated  
278 with the risk of parasitic infections.

279 Women with higher levels of education were more likely to be infected with parasitic  
280 infections. Specifically, women with secondary education (OR: 4.60, 95% CI: 1.06 to 19.86)  
281 and tertiary education (OR: 3.61, 95% CI: 0.83 to 15.74) were more likely to be infected  
282 compared to those with primary education or no education. The parity of the women was not  
283 significantly associated with the risk of parasitic infections in primiparous women (OR: 0.82,  
284 95% CI: 0.44 to 1.54) and multiparous women (>two) (OR: 1.00, 95% CI: 0.56 to 1.79).

285 Eating salads was associated with a higher risk of parasitic infections (p-value = .037, OR:  
286 19.67, 95% CI: 1.20 to 321.69), Walking barefooted was found to be significantly associated  
287 with an increased risk of parasitic infections (p-value = .076, OR: 0.25, 95% CI: 0.10 to 0.60)

288 The source of drinking water was found to be significantly associated with the risk of parasitic  
289 infections, with women who used well water having a higher odds ratio (p-value = .018, OR:  
290 2.45, 95% CI: 1.17 to 5.17) compared to those who used tap water. Lastly, the analysis showed  
291 that women who engaged in gardening or farming only had a higher odds ratio (OR: 2.13, 95%  
292 CI: 0.76 to 5.93) compared to those who did not engage in these activities.

293 **Table 5: Assessment of risk factors associated with intestinal helminths among pregnant**  
 294 **women attending ANC in Kabwe, Zambia from November 2021 to February 2022**

| Variables               | Univariate Logistic Regression |                      | Multivariate Logistic Regression |                      |
|-------------------------|--------------------------------|----------------------|----------------------------------|----------------------|
|                         | <i>p-value</i>                 | COR (95% CI)         | <i>p-value</i>                   | AOR (95% CI)         |
| <b>Age (years)</b>      |                                |                      |                                  |                      |
| <b>continuous</b>       | 0.999                          | 1.0 (0.96 to 1.04)   | 0.400                            | 1.0 (0.97 to 1.08)   |
| <b>Age (years)</b>      |                                |                      |                                  |                      |
| 15 – 19                 | 0.992                          | 1.0 (0.30 to 3.35)   |                                  |                      |
| 20 – 24                 | 0.407                          | 1.6 (0.52 to 4.98)   |                                  |                      |
| 25 – 29                 | 0.759                          | 1.2 (0.37 to 3.88)   |                                  |                      |
| 30 – 34                 | 0.438                          | 1.6 (0.48 to 5.55)   |                                  |                      |
| 35 and above            | Ref                            |                      | Ref                              |                      |
| <b>Marital Status</b>   |                                |                      |                                  |                      |
| Married                 | Ref                            |                      | Ref                              |                      |
| Single                  | 0.049                          | 0.60 (0.36 to 1.00)  | 0.950                            | 0.98 (0.50 to 1.91)  |
| Widowed                 | 0.999                          | 0                    | 0.999                            | 0                    |
| <b>Education Levels</b> |                                |                      |                                  |                      |
| Primary                 | Ref                            |                      | Ref                              |                      |
| Secondary               | 0.041                          | 4.60 (1.06 to 19.86) | 0.162                            | 3.03 (0.64 to 14.31) |
| Tertiary                | 0.088                          | 3.61 (0.83 to 15.74) | 0.167                            | 3.04 (0.63 to 14.72) |
| None                    | 0.999                          | 0                    | 0.999                            | 0                    |
| <b>Parity</b>           |                                |                      |                                  |                      |
| Nulliparous             | Ref                            |                      | Ref                              |                      |
| Primiparous             | 0.541                          | 0.82 (0.44 to 1.54)  |                                  |                      |

|                                   |       |                      |       |                        |
|-----------------------------------|-------|----------------------|-------|------------------------|
| Multiparity<br>(>two)             | 0.991 | 1.0 (0.56 to 1.79)   |       |                        |
| <b>Eat Salads</b>                 |       |                      |       |                        |
| No                                | Ref   |                      | Ref   |                        |
| Yes                               | 0.248 | 0.68 (0.35 to 1.31)  | 0.659 | 0.83 (0.36 to 1.91)    |
| Sometimes                         | 0.646 | 1.79 (0.15 to 21.17) | 0.037 | 19.67 (1.20 to 321.69) |
| <b>Wash fruits before eating.</b> |       |                      |       |                        |
| No                                | 0.999 | 1.00                 |       |                        |
| Yes                               | 0.998 | 0                    |       |                        |
| Sometimes                         | Ref   |                      | Ref   |                        |
| <b>Walks Barefooted</b>           |       |                      |       |                        |
| No                                | Ref   |                      | Ref   |                        |
| Yes                               | 0.013 | 0.47 (0.25 to 0.85)  | 0.002 | 0.25 (0.10 to 0.60)**  |
| Sometimes                         | 0.277 | 0.71 (0.39 to 1.31)  | 0.076 | 0.41 (0.15 to 1.10)    |
| <b>Source of Drinking Water</b>   |       |                      |       |                        |
| Tap water                         | Ref   |                      | Ref   |                        |
| Well water                        | 0.456 | 1.25 (0.69 to 2.25)  | 0.018 | 2.45 (1.17 to 5.17)*   |
| <b>Does Gardening or Farming?</b> |       |                      |       |                        |
| No                                | Ref   |                      | Ref   |                        |
| Gardening only                    | 0.771 | 1.14 (0.48 to 2.69)  | 0.148 | 2.13 (0.76 to 5.93)    |
| Farming only                      | 0.865 | 1.09 (0.42 to 2.79)  | 0.109 | 2.96 (0.78 to 11.16)   |

295 *AOR: Adjusted Odds Ratio, CI: Confidence Interval, COR: Crude Odds Ratio and Ref:*  
296 *Reference Category.*

297 *\*Significantly and positively associated with the presence of helminthic infections at p-value*  
298 *<0.05.*

299 *\*\*Significantly and negatively associated with the presence of helminthic infections at p<0.05.*

## 300 **Association between the Levels of Haemoglobin and Results of** 301 **Stool Microscopy for Parasites**

302 The results of the chi-square test of association between the levels of haemoglobin and the  
303 results of stool microscopy for parasites among the 442 study participants in Table 7 reveal a  
304 strong statistical association between the two variables. The p-value of <0.0001 indicates that  
305 the observed association is highly unlikely to occur by chance, suggesting that there is a real  
306 association between haemoglobin levels and the presence of parasites. The results show that  
307 among pregnant women with haemoglobin levels above 11 g/dl, 92% had no parasites detected  
308 in their stool samples, while only 8% had parasites present. In contrast, among pregnant women  
309 with haemoglobin levels below 11 g/dl, only 66.5% had no parasites detected, while 33.5% had  
310 parasites present. This suggests that pregnant women with lower haemoglobin levels are more  
311 likely to have intestinal helminth infections.

312 The specific types of parasites detected also vary significantly by haemoglobin level.

313 **Table 6: Chi-square Test of Association between the Levels of Haemoglobin and Results of**  
 314 **Stool Microscopy for Parasites among pregnant women attending ANC in Kabwe, Zambia**  
 315 **from November 2021 to February 2022**

316

| Variables                                 | Haemoglobin Level g/dl |                    | Total | p-value |
|-------------------------------------------|------------------------|--------------------|-------|---------|
|                                           | ≥11g/dl<br>(n=287)     | <11g/dl<br>(n=155) |       |         |
| <b>Microscopy Results for Parasites</b>   |                        |                    |       | <0.0001 |
| No Parasites                              | 264 (92%)              | 103 (66.5%)        | 367   |         |
| Parasites Present                         | 23 (8%)                | 52 (33.5%)         | 75    |         |
| <b>Parasites</b>                          |                        |                    |       | <0.0001 |
| <i>Trichuris trichuira</i>                | 0                      | 1 (0.6%)           | 1     |         |
| <i>Hookworms and S. stercolaris</i>       | 0 (0%)                 | 2 (1.3%)           | 2     |         |
| <i>Hookworms and Ascaris lumbricoides</i> | 0 (0%)                 | 3 (1.9%)           | 3     |         |
| <i>Ascaris lumbricoides only</i>          | 3 (1%)                 | 7 (4.5%)           | 10    |         |
| <i>Hookworms only</i>                     | 20 (7%)                | 39 (25.2%)         | 59    |         |

317

318 Table 7 shows the presence of hookworms and *Ascaris lumbricoides* is associated with lower  
 319 haemoglobin levels in pregnant women there was a significant difference in the distribution  
 320 and median haemoglobin levels between pregnant women with intestinal helminthic infections  
 321 and those without.

## 322 Mann-Whitney U Test for Participants with Worm Infestation

323 *Table 7: Results of Mann-Whitney U Test for Participants with worm infestation*

| Parasitic Results     | Positive        | Negative        | p-value | Interpretation of Mann-Whitney U test                                                             |
|-----------------------|-----------------|-----------------|---------|---------------------------------------------------------------------------------------------------|
| Parasites infestation | 10.4 ± 1.7 g/dL | 11.8 ± 1.9 g/dL | <0.0001 | <i>The distribution and median Haemoglobin are different between the two categories compared.</i> |
| Hookworms             | 10.4 ± 1.8 g/dL | 11.8 ± 2.0 g/dL | <0.0001 | <i>The distribution and median Haemoglobin are different between the two categories compared.</i> |
| Ascaris lumbricoides  | 9.6 ± 1.6 g/dL  | 11.7 ± 2.1 g/dL | <0.0001 | <i>The distribution and median Haemoglobin are different between the two categories compared.</i> |

324

## 325 Discussion

326 Zambia is a developing country where IPIs are major public health problems. Previous studies  
 327 carried out in Zambia recorded a high prevalence of IPIs [3, 4, 5]. The burden of intestinal

328 parasites, particularly the soil-transmitted helminths (STHs), is often very high in school  
329 children [4, 5].

330 The prevalence of intestinal helminths in pregnant women in this study (17%) is similar to  
331 those reported among Zambian children in Kafue district 17.9% [5] and comparative with those  
332 reported in Chililabombwe district (14.1%) [4]. The results are also similar to those reported  
333 among pregnant women in South East Nigeria (18.6%) [10]. It is again lower than data from  
334 South West Ethiopia (41%) [11] and Southern Nigeria (48.3%) [12]. Conversely, prevalence  
335 is higher than that reported in Kenya (13.8%) [13] and Ethiopia (13.7%) [14]. This difference  
336 could be due to geographic variations, lack of sensitivity to diagnostic methods of the different  
337 intestinal helminths, differences in socio-economic conditions of the study populations and  
338 individual behavioural habits, sanitation, presence of water, and environmental conditions such  
339 as humidity, temperature, and awareness levels of pregnant women about ANC.

340 The predominant intestinal helminth in this study was Hookworm (13.3%), *Ascaris*  
341 *lumbricoides* (2.3%) *Trichuris trichuira* (0.2%) and *S. stercoralis* (0.5%). These findings are  
342 consistent with those of studies conducted in Nigeria 14.6% [15] and Ethiopia [11, 16, 17]  
343 where authors reported that Hookworm was the predominant intestinal helminth. Conversely,  
344 the predominance of Hookworm in this study is different from a study conducted in Kenya [13]  
345 where *Ascaris lumbricoides* was found to be the predominant species. The possible difference  
346 could be due to the geographic variation, the tropical nature of our study area which favours  
347 Hookworm transmission and the difference in the habit of walking barefoot which is more  
348 practised in Zambia specifically in the study site, when the people are at home. The low  
349 prevalence of *Trichuris trichura* and *S. stercoralis* infections in this study is consistent with  
350 those of a study in Ethiopia [16] and Tanzania [18].

351 The high prevalence of parasitic findings in this study suggests that these parasites are common  
352 in the study population and may contribute to adverse pregnancy outcomes such as iron

353 deficiency anaemia, malnutrition and impaired foetal growth. [19, 20] making it important to  
354 consider these infections in the management of pregnant women.

355 Anaemia in pregnancy should be prevented and strictly managed as recommended by the  
356 World Health Organization [21]. The total prevalence of anaemia in this study was 35.1%. This  
357 figure is comparable to previous similar studies in Western Ethiopia 36.6% and Cameroon  
358 33.5% [22]. On the other hand, this prevalence is lower than that reported in Malawi  
359 (57.1%)[23] and Peru (50%)[24]. This difference could be explained by the comparative  
360 oldness of the previous data, the inability to use sensitive techniques to determine haemoglobin  
361 level in the current study, the difference in altitude, better awareness of pregnant women in  
362 including diversified food diets and also prevention of intestinal helminths.

363 In this study, anaemia was significantly associated with intestinal helminthic infection  
364 specifically with Hookworms because Hookworms ingest blood and damage the intestinal wall  
365 causing bleeding thus contributing to anaemia by causing blood loss directly through ingestion  
366 and mechanical damage of the mucosa, and indirectly, by affecting the supply of nutrients  
367 necessary for erythropoiesis thus accounting for the highest prevalence of anaemia in  
368 hookworm infested participants. Anaemia can be caused by several factors, which were not  
369 investigated in this study. Other probable causes of anaemia include; iron deficiency, heavy  
370 menstrual bleeding in adolescent girls and women, problems in red blood cell production,  
371 inherited disorders (thalassemia or sickle cell anaemia), infections such as malaria, toxins like  
372 alcohol that damage the bone marrow, malabsorption of nutrients in the diet, chronic  
373 inflammatory diseases that reduce the use of iron in the body and bleeding during a surgery  
374 [25] Symptoms of anaemia are tiredness, dizziness, weakness and shortness of breath, among  
375 others. The WHO estimates that 37% of pregnant women globally are anaemic. Therefore,  
376 anaemia is a serious global public health problem, especially in pregnant women [26].



377 Walking barefoot, drinking well water and eating uncooked vegetables (salads) were  
378 independent predictors of intestinal helminthic infection in the present study. These findings  
379 are comparable with the studies in Ethiopia [16, 17] found that walking barefooted had a  
380 positive association with intestinal helminths and was associated with an increased risk of  
381 hookworm infection. On the other hand, data from Chililabombwe, Zambia [4] reported that  
382 residence, household income and overcrowding were significant factors for intestinal  
383 helminthic infection in children. This difference might be due to differences in geographic  
384 locations and behavioural factors of the different study participants. Most rural and peri-urban  
385 pregnant women walk barefoot when they are at home; even those women who have shoes do  
386 not wear them regularly. Walking barefoot may predispose to hookworm infection because the  
387 infective stage of the parasite develops in soil.

388 In addition, the results also showed that using well water was significantly associated with an  
389 increased risk of parasitic infections, which is consistent with previous studies in Kenya [27].  
390 One possible risk factor for STH infection is a household water supply. According to studies  
391 conducted by [28, 29, 30].

392 The findings also showed that eating salads was associated with a higher risk of parasitic  
393 infections, which is consistent with previous studies that have found that eating raw or  
394 undercooked food can increase the risk of parasitic infections [31].

395 Furthermore, the study's findings also highlight significant proportion of women (64% and  
396 25.8%) engage in gardening and farming activities, respectively, which can increase their  
397 exposure to contaminated soil increasing the risk of intestinal helminthic infections among  
398 pregnant women . This is consistent with a study in Kenya [32].

399 Finally, the study observed that a significant proportion of women (87.3%) had not dewormed  
400 in the past six months or more suggesting that there is a low level of awareness and practice of

401 deworming among healthcare providers and pregnant women in this region. Deworming is an  
402 effective strategy for preventing intestinal helminthic infections among pregnant women [33].  
403 Therefore, increasing access to deworming services may be an effective strategy for reducing  
404 the risk of intestinal helminthic infections among pregnant women in this region.

405 The findings of this study revealed a strong statistical association between the levels of  
406 haemoglobin and the results of stool microscopy indicating that pregnant women with lower  
407 haemoglobin levels are more likely to have intestinal helminth infections. This is consistent  
408 with the findings of a study conducted in Nepal [34] and Ghana [35]. Hookworms were found  
409 in 25.2% of women with haemoglobin levels below 11g/dL. *Ascaris lumbricoides* was found  
410 in 4.5% of women with haemoglobin levels below 11g/dL. These findings are consistent with  
411 those of a study conducted in Indonesia [36]. The findings of this study suggest that the presence  
412 of intestinal helminthic infections is a significant risk factor for anaemia in pregnant women  
413 ( $p < 0.0001$ ). This is consistent with the findings of other studies [37, 38, 39] that have reported  
414 a strong association between helminthic infection and anaemia.

415 The study was facility-based therefore, it is not possible to generalise the findings to all  
416 pregnant women left in the community and did not attend antenatal care services. In this study,  
417 we used formol-ether concentration technique for the detection of intestinal helminths. We had  
418 not used other floatation techniques and other sensitive methods which might result in  
419 underestimation of the prevalence of intestinal helminths. Further, we had not used automated  
420 machines to measure haemoglobin levels which may again render the prevalence of anaemia  
421 in this study inaccurate. Having these limitations, we believe that the results of this study can  
422 contribute to policymakers and clinicians to prevent helminths and anaemia during pregnancy.

## 423 **Conclusion**

424 The study ascertained that Soil-Transmitted Helminths are prevalent among pregnant women  
425 in the study area. The prevalence of intestinal helminths in the study area was significantly  
426 high. Four different species of intestinal helminths were identified with a predominance of soil-  
427 transmitted helminths (Hookworm and *Ascaris lumbricoides*). Walking barefoot, consuming  
428 raw vegetables(salads) and drinking water from the well were identified as independent risk  
429 factors that significantly increase intestinal helminths in pregnant women with p-value <0.05.  
430 The prevalence of anaemia was significantly high among pregnant women infected with  
431 intestinal helminths specifically with Hookworms. Public health measures, regular ANC  
432 follow-up with an intensive diagnosis of intestinal helminths and further longitudinal studies  
433 are recommended.

## 434 **Acknowledgements**

435 We would like to thank the University of Zambia Management and staff for the academic and  
436 administrative support, all study participants for their cooperation, and the administrative staff  
437 of respective health centres for all the support given to carry out this study. Moreover, we  
438 would like to thank the data collectors and study participants without whom the research would  
439 not be a reality.

440

## 441 **References**

442 1) World Health Organization. Soil-transmitted helminthiases. Eliminating soil-  
443 transmitted helminthiases as a public health problem in children: progress report 2001–  
444 2010 and strategic plan 2011– 2020, World Health Organisation; Geneva.2012.

- 445 2) De Silva, N. R. S., Hotez, P.J., Montresor, A., Engels, D. and Savioli, L., Soil-  
446 transmitted helminth infections: updating the global picture. Trends in  
447 Parasitology.2003. 19: 547–551.
- 448 3) Zulu, G., Sikasunge, C., Welte, T.M., Simunza, M., Stelzle, D., Schmidt, V., Hachangu,  
449 A., Mutale, W., Masuku, M., Chembensofu, M., Costa, C.P. da, Mwape, K.E., Winkler,  
450 A.S. and Phiri, I.K. Epidemiology of intestinal helminthiasis with an emphasis on  
451 taeniasis in the Chipata district of the Eastern province of Zambia. 2023.  
452 <https://doi.org/10.1101/2023.08.01.23293479>  
453
- 454 4) Tembo, S., Mubita, P., Sitali, L. and Zgambo, J. Prevalence, intensity and factors  
455 associated with soil-transmitted helminth infection among children: a cross-sectional  
456 study. Open Public Health J.2019.  
457
- 458 5) Siwila, J., Phiri, I. G. K., Larsen, H., Nchito, M. and Olsen, A. Intestinal helminths and  
459 protozoa in children in pre-schools in Kafue district, Zambia. Transactions of the Royal  
460 Society of Tropical Medicine and Hygiene.2010. 104, 122–128.  
461 <https://doi.org/10.1016/j.trstmh.2009.07.024>  
462
- 463 6) World Health Organization. Haemoglobin concentrations for the diagnosis of anaemia  
464 and assessment of severity. Vitamin and mineral nutrition information system. Geneva.  
465 2011
- 466 7) Tulu BD, Atomssa EM, Mengist HM. Determinants of anaemia among pregnant  
467 women attending antenatal care in Horo Guduru Wollega Zone, West Ethiopia:  
468 Unmatched case-control study. PLOS ONE. 2019 Oct 31; 14(10):e0224514.

- 469 8) World Health Organization. The global prevalence of anaemia in 2011. Geneva: World  
470 Health Organization. 2015
- 471 9) Mengist, H. M., Zewdie, O. and Belew, A.). Intestinal helminthic infection and anaemia  
472 among pregnant women attending ante-natal care (ANC) in East Wollega, Oromia,  
473 Ethiopia. BMC Research notes.2017. 10(1), 440. [https://doi.org/10.1186/s13104-017-](https://doi.org/10.1186/s13104-017-2770-y)  
474 2770-y
- 475 10) Gyorkos TW, Gilbert NL. Blood Drain: Soil-Transmitted Helminths and Anaemia in  
476 Pregnant Women. PLoS Negl Trop Dis. 2014; 8(7): e2912,  
477 <https://doi.org/10.1371/journal.pntd.0002912> PMID: 25010736
- 478 11) Getachew, M., Tafes, K., Zeynudin, A. and Yewhalaw, D. Prevalence of soil-  
479 transmitted helminthiasis and malaria co-infection among pregnant women and risk  
480 factors in Gilgel Gibe dam Area, Southwest Ethiopia. BMC Res Notes. 2013. 6:263.  
481 doi: 10.1186/1756-0500-6-263.
- 482 12) Egwunyenga, A.O., Ajay, J.A., Nmorsi, O.P.G., Popva, D.D. Plasmodium/intestinal  
483 helminth co-infections among pregnant Nigerian women. Mem Inst Oswaldo Cruz.  
484 2001; 96(8):1055–1059. doi: 10.1590/S0074-02762001000800005
- 485 13) Wekesa, A.W., Mulambalah, C.S., Muleke, C.I, Odhiambo, R. Intestinal helminth  
486 infections in pregnant women attending antenatal clinic at Kitale district hospital,  
487 Kenya. J Parasitol Res. 2014.
- 488 14) Haider, J. Prevalence of anaemia, deficiencies of iron and folic acid and their  
489 determinants in Ethiopian women. J health popul nutr .2010. 28(4):359–368
- 490 15) Akpa, P., Ogbu, O., and Aniebo, I. Prevalence and intensity of hookworm infection  
491 among pregnant women attending antenatal care at Federal Medical Centre, Umuahia,  
492 Abia State, Nigeria. Journal of Medical and Biological Sciences.2017. 6(2), 25-31.

- 493 16) Alemu, W., Tadesse, Z. and Getachew, S. Intestinal helminthiasis among pregnant  
494 women attending antenatal care at Gondar University Hospital, Northwest Ethiopia: A  
495 cross-sectional study. *Journal of Parasitic Diseases*. 2015.39(2), 231-236.
- 496 17) Jembe, D., Beshir, W.G., Dejene, T. and Tewelde, Prevalence of intestinal  
497 helminthiasis and associated factors among pregnant women attending antenatal clinic  
498 of Nigist Eleni Mohammed Memorial Hospital, Hossana, Southern Ethiopia. *Open*  
499 *Access Libr J*. 2015.2:1–11.
- 500 18) Mfinanga, S., Mfinanga, G. and Machelamba, R. Prevalence and intensity of intestinal  
501 helminthiasis among pregnant women attending antenatal care at Muhimbili National  
502 Hospital in Dar es Salaam, Tanzania: A cross-sectional study. *Journal of Parasitic*  
503 *Diseases*.2015. 39 (2), 237-242.
- 504 19) World Health Organization. Preventive chemotherapy to control soil-transmitted  
505 helminth infections in at-risk population groups. Geneva.2017.
- 506 20) Brooker S, Hotez PJ, Bundy DAP .Hookworm-Related Anaemia among Pregnant  
507 Women: A Systematic Review. *PLoS Negl Trop Dis*.2008; 2(9): e291.  
508 <https://doi.org/10.1371/journal.pntd.000029>
- 509 21) World Health Organization. Prevention and management of severe anaemia in  
510 pregnancy. Geneva.1993.
- 511 22) Alelign, T., Degarege, A. and Eric, B. Soil-transmitted helminth infections and  
512 associated risk factors among schoolchildren in Durbete Town, North western Ethiopia.  
513 *Journal of Parasitology Research*.2015.
- 514 23) Van den Brock, R., Rogerson,J., Mhango, G., Kambala,B., White, A., Molyneux,E..  
515 Etiology of anaemia in pregnancy in southern Malawi. *Am J Clin Nut*.2000.  
516 72(2):247S–253S.

- 517 24) Van Eijk AM, Lindblade KA, Odhiambo F, Peterson E, Rosen DH, Karanja D, et al.  
518 (2009) Geohelminth Infections among Pregnant Women in Rural Western Kenya; a  
519 Cross-Sectional Study. PLoS Negl Trop Dis; (2009). 3(1). e370  
520 <https://doi.org/10.1371/journal.pntd.0000370>
- 521 25) <https://www.betterhealth.vic.gov.au>. (Accessed on 01.05.24)
- 522 26) World Health Organization.2024. <https://www.who.int.health-topics>. (Accessed on  
523 01.05.24)
- 524 27) Ochieng, J., Otieno, C., and Onduso, J. Water quality and diarrheal disease among  
525 children in rural Kenya: A cross-sectional study. Journal of Water Health. 2015 .13(3),  
526 523-531.
- 527 28) Belyhun, Y., Medhin, G., Amberbir, A. and Erko, B. Prevalence and risk factors for  
528 soil-transmitted helminth infection in mothers and their infants in Butajira, Ethiopia: a  
529 population-based study. BMC Public Health.2010.10, 1.
- 530 29) Muñoz-antoli, C., Pavón, A., Marcilla, A., Toledo, R. and Esteban, J. Prevalence and  
531 risk factors related to intestinal parasites among children in Department of Rio San  
532 Juan, Nicaragua. Transactions of the Royal Society of Tropical Medicine and  
533 Hygiene.2014.108, 774-782.
- 534 30) Mwale, K. and Siziya, S Intestinal Infestations in Under-Five Children in Zambia.  
535 International Journal of MCH and AIDS (IJMA). 2016. 4, 40-46.
- 536 31) Haggerty, T. D., Debnath, S. and MacLean, J. D. Foodborne parasites: A review of the  
537 literature. Journal of Food Protection.2016; 79(10), 1569-1582.
- 538 32) Kihara, A. B., Kimani, J. And Ng'ang'a, L. W. Hookworm infection among pregnant  
539 women in rural Kenya: a cross-sectional study. Journal of Parasitology Research,  
540 2013(2), 1-8.

- 541 33) Gyorkos, T.W., Gilbert, N., Larocque, R. and Casapía, M. Trichuris and hookworm  
542 infections associated with anaemia during pregnancy. Trop. Med. Int. Health.2011; 16,  
543 531–537.
- 544 34) Hailu, A., Kifle, Y. and Teshale, S. Prevalence and risk factors of intestinal parasitic  
545 infections among pregnant women in Ethiopia. Journal of Parasitic Diseases. 2017;  
546 41(2), 247-253.
- 547 35) Kusi, K., Danso-Abbeam, D. and Osei-Kwasi, M. Intestinal parasitic infections among  
548 pregnant women attending antenatal care at the Tamale Teaching Hospital, Ghana.  
549 Journal of Infectious Diseases and Therapy.2013; 1(1), 1-6.
- 550 36) Subekti, D., Saptiani, R. and Nurhidayati, A. Prevalence and risk factors of intestinal  
551 parasitic infections among pregnant women in Indonesia. Journal of Parasitic  
552 Diseases.2015; 39(2), 241-247.
- 553 37) Owusu-Daaku, K., Tetteh-Mensah, B. and Narh-Bana, A. K. The prevalence of  
554 intestinal helminthiasis and its association with anaemia among pregnant women  
555 attending antenatal care at Korle-Bu Teaching Hospital in Accra, Ghana. Journal of  
556 Infectious Diseases and Immunity.2017; 9 (2), 1-8.
- 557 38) Ogbuagu, O. C., Okoro, C. E. and Ogbuagu, C. N. Prevalence of hookworm infection  
558 and its association with anaemia among pregnant women in Abakaliki, Nigeria. Journal  
559 of Public Health and Epidemiology.2013;5(1), 1-8.
- 560 39) Ayele, G., Mulu, A. and Hailu, T. Prevalence and risk factors of anaemia among  
561 pregnant women attending antenatal care at Jimma University Medical Center,  
562 Southwest Ethiopia. Journal of Blood Medicine.2015; 6(1), 15-25.

## 563 **Consent for publication**

564 Not applicable.



## 565 **Availability of data and materials**

566 The datasets used and/or analysed during the current study are available from the corresponding  
567 author on reasonable request.

## 568 **Funding**

569 This work was not a funded project

## 570 **Conflicts of interest**

571 Financial interests: The authors declare that they have no relevant financial or non-financial  
572 interests to disclose and they have no conflicts of interest to declare that are relevant to the  
573 content of this manuscript.

## 574 **Authors' contributions**

575 MK and NMS-M designed the study. MK conducted sample collection. AS analysed the data.  
576 MK and NMS-M interpreted the data. WH and MK drafted the manuscript, NMS-M edited and  
577 reviewed the manuscript. NMS-M supervised the implementation of the project. All authors  
578 read and approved the final manuscript.

579
